# Supplementary material for: Heart rate variability in type 2 diabetes mellitus: A systematic review and meta–analysis
Source: PubMed Central journal article supplement (PMC5880391; doi:10.1371/journal.pone.0195166), 2018-04-02
Supplement: pone.0195166.s002.pdf [file pone.0195166.s002.pdf]

## S1 Appendix. Example of search strategy on PubMed database.

1. Go to the Pubmed official page <https://www.ncbi.nlm.nih.gov/pubmed/>
2. In the search bar, write the following text: “diabetes AND (“heart rate variability” OR “HRV”)  
[https://www.ncbi.nlm.nih.gov/pubmed/?term=diabetes+AND+\(%E2%80%9Cheart+rate+variability%E2%80%9D+OR+%E2%80%9CHR%E2%80%9DV%E2%80%9D\)](https://www.ncbi.nlm.nih.gov/pubmed/?term=diabetes+AND+(%E2%80%9Cheart+rate+variability%E2%80%9D+OR+%E2%80%9CHR%E2%80%9DV%E2%80%9D))

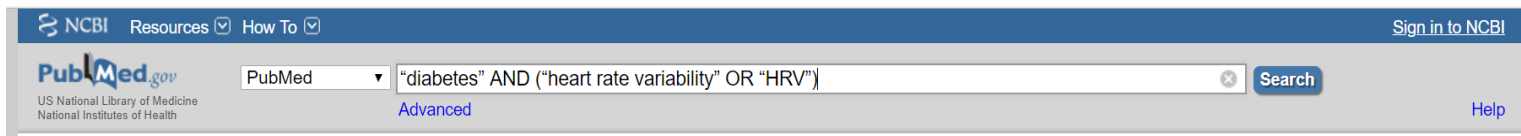

The screenshot shows the top navigation bar of the NCBI website with links for 'Resources' and 'How To'. The main search area features the 'PubMed.gov' logo, a dropdown menu set to 'PubMed', and a search input field containing the query: "diabetes" AND ("heart rate variability" OR "HRV"). A 'Search' button is located to the right of the input field. Below the search bar, there is a link for 'Advanced' search options and a 'Help' link in the bottom right corner.

3. All results will appear
4. Then eligible articles need to be reviewed one by one
